# Supplementary material
Source: Research Square preprint supplement (doi:10.21203/rs.3.rs-8662685/v1)

Appendix A

Appendix A.1 Soft tissue tumors referral pathways


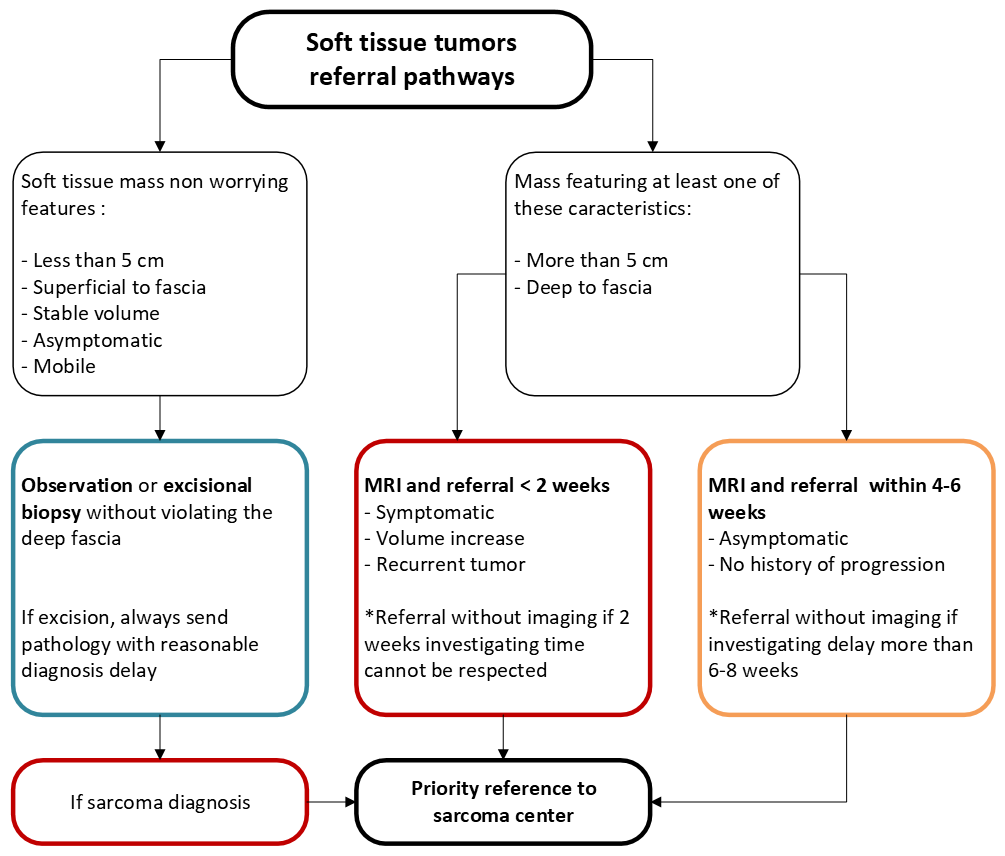


Appendix A.2 Bone tumors referral pathways
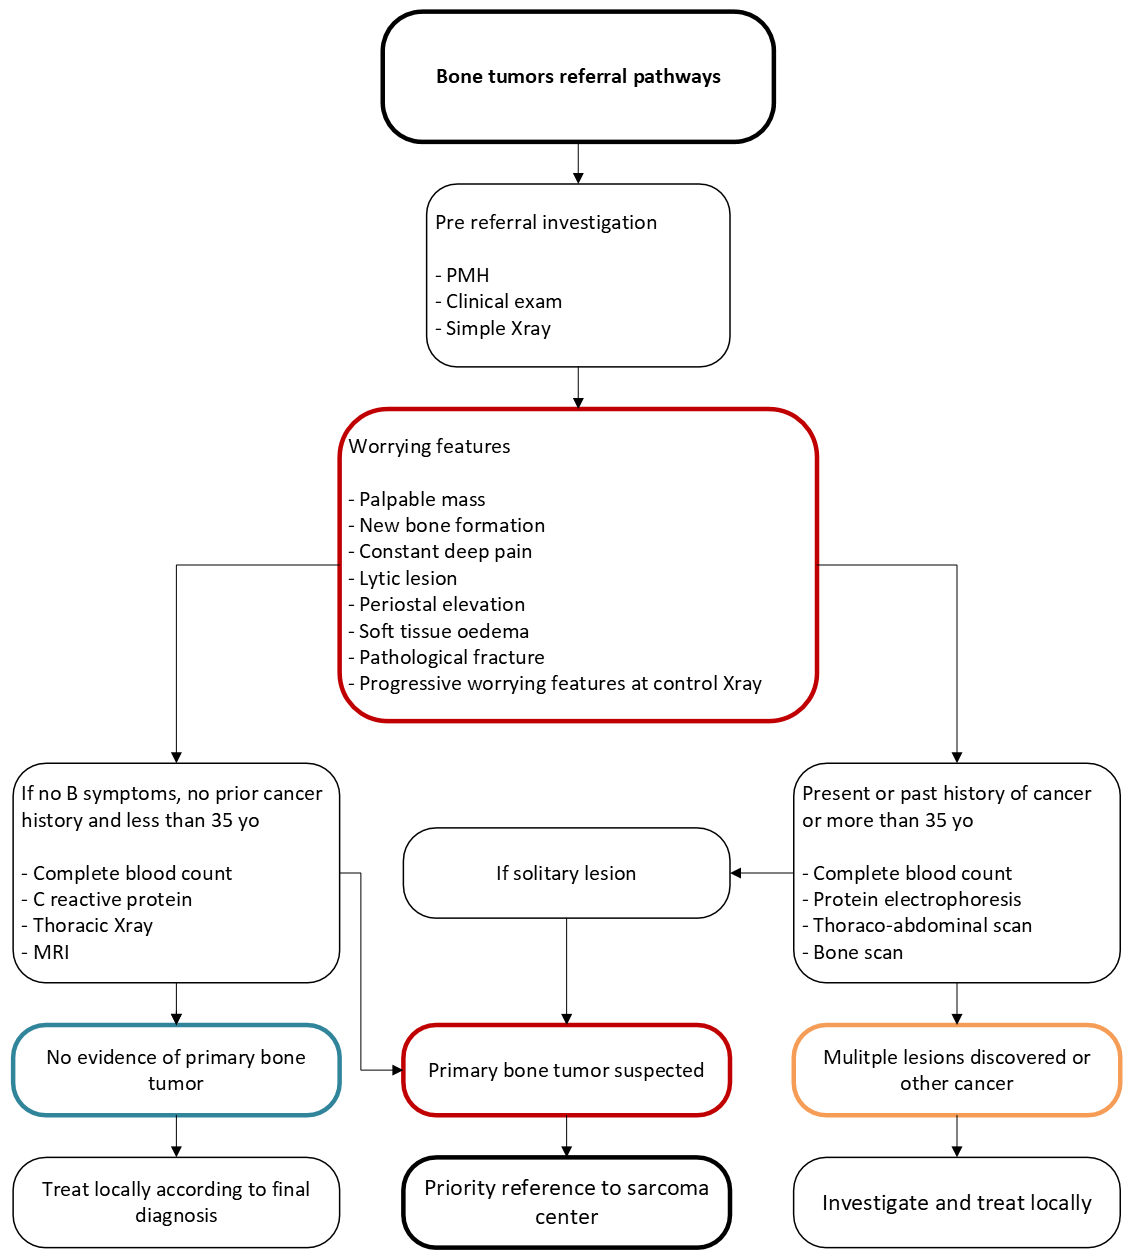

Supplement: Supplementary file 1 [file ff13002085485bc416be4c4a.docx]
